# Supplementary material for: Attenuated Epigenetic Suppression of Muscle Stem Cell Necroptosis Is Required for Efficient Regeneration of Dystrophic Muscles
Source: PubMed Central journal article supplement — Cell Rep. 2020 May 19;31(7):107652. doi: 10.1016/j.celrep.2020.107652 (PMC7242912; doi:10.1016/j.celrep.2020.107652), 2020-05-19
Supplement: mmc1.pdf [file mmc1.pdf]

**Cell Reports, Volume 31**

**Supplemental Information**

**Attenuated Epigenetic Suppression  
of Muscle Stem Cell Necroptosis Is Required  
for Efficient Regeneration of Dystrophic Muscles**

**Krishnamoorthy Sreenivasan, Alessandro Ianni, Carsten Künne, Boris Strilic, Stefan Günther, Eusebio Perdiguero, Marcus Krüger, Simone Spuler, Stefan Offermanns, Pablo Gómez-del Arco, Juan Miguel Redondo, Pura Munoz-Canoves, Johnny Kim, and Thomas Braun**

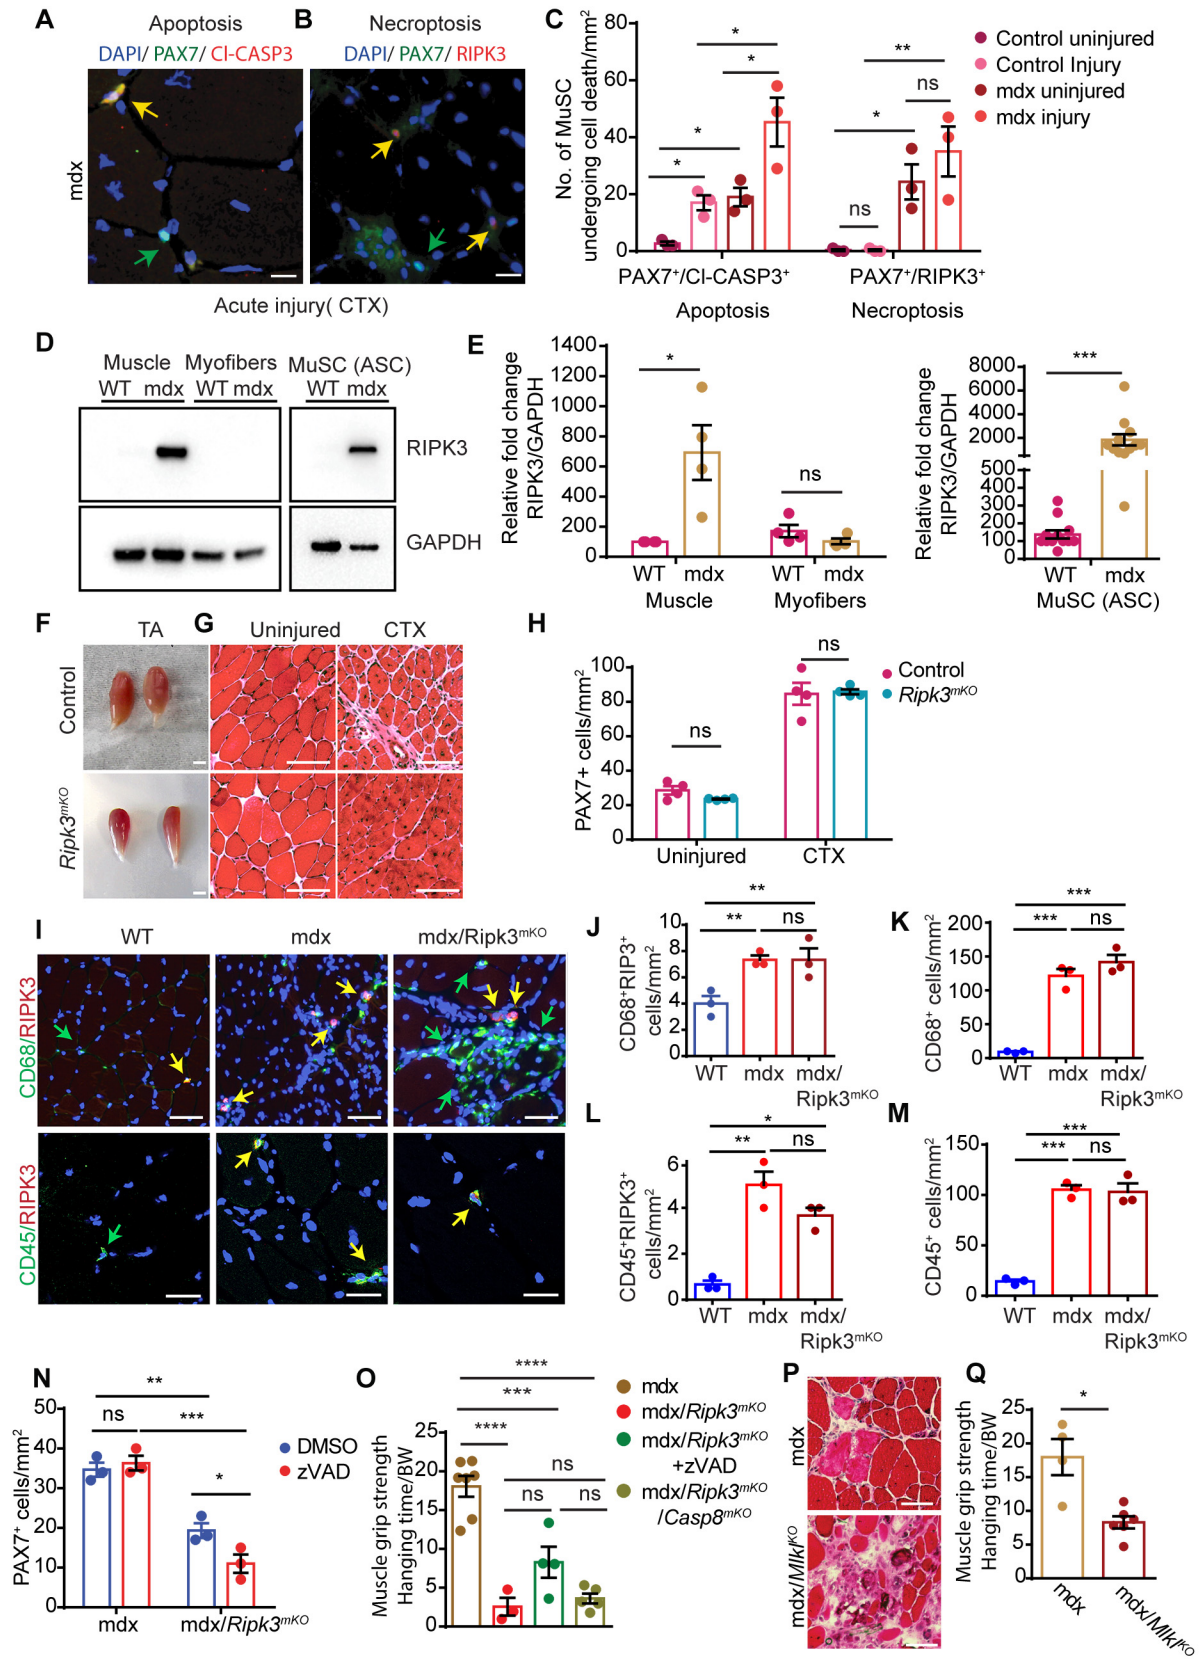

**Supplemental Figure 1: Chronic but not acute muscle injury reduces the numbers of Ripk3 deficient MuSC. Related to Figure 1 and 2.**

(A-B) Immunofluorescence staining of TA muscle cross-sections from *mdx* mice two weeks after CTX injury using antibodies against PAX7 and cleaved CASP3 to detect apoptosis (A) and PAX7 and RIPK3 to detect necroptosis (B) in MuSC. Scale bar: 25  $\mu$ m.

(C) Quantification of apoptotic and necroptotic cells (n=3 for each group).

(D-E) Western blot analysis of purified myofibers and MuSCs isolated from subfractionated bulk skeletal muscle from wildtype and *mdx* mice and quantified in (E), (n=3-12 for each group).

(F) Macroscopic images of *Ripk3<sup>mKO</sup>* and control TA muscles two weeks after CTX induced injury.

(G) H&E staining of cross sections from *Ripk3<sup>mKO</sup>* and control TA muscles two weeks after CTX induced injury. Scale bar (D, E): 100  $\mu$ m.

(H) Quantification of PAX7<sup>+</sup> MuSC in control and *Ripk3<sup>mKO</sup>* mice with and without CTX injury (n=4 for each group).

(I) Immunofluorescence staining of TA muscle cross-sections from WT, *mdx* and *mdx/Ripk3<sup>mKO</sup>* mice using antibodies against CD68, CD45, and RIPK3. Scale bar: 25  $\mu$ m.

(J-M) Quantification of CD68<sup>+</sup> and CD45<sup>+</sup> cells in TA muscle sections (n=3 for each group).

(N) Quantification of PAX7<sup>+</sup> MuSCs from *mdx* and *mdx/Ripk3<sup>mKO</sup>* mice two weeks after induction of Ripk3 inactivation and treatment with DMSO or zVAD (n=3-4 for each group; \*p<0.05; \*\*p<0.01, \*\*\*p<0.005; two-way ANOVA followed by Bonferroni post-test with alpha=5%).

(O) Quantification of muscle grip strength of *mdx*, *Ripk3<sup>mKO</sup>/mdx*, zVAD treated *Ripk3<sup>mKO</sup>/mdx* and *Ripk3<sup>mKO</sup>/Casp8<sup>mKO</sup>/mdx* mice (n=3-6 for each group; \*\*\*p<0.005, \*\*\*\*p<0.001 two-way ANOVA followed by Bonferroni post-test with alpha=5%).

(P) H&E staining of TA muscle cross-sections from *mdx* and *Mlkl<sup>KO</sup>/mdx* mice Scale bar (D, E): 100  $\mu$ m.

(Q) Quantification of muscle grip strength of *mdx* and *Mlkl<sup>KO</sup>/mdx* mice (n=4-6 for each group; \*p<0.05, two-way ANOVA followed by Bonferroni post-test with alpha=5%).

All analyses indicated across the experiments were biological replicates unless otherwise stated.

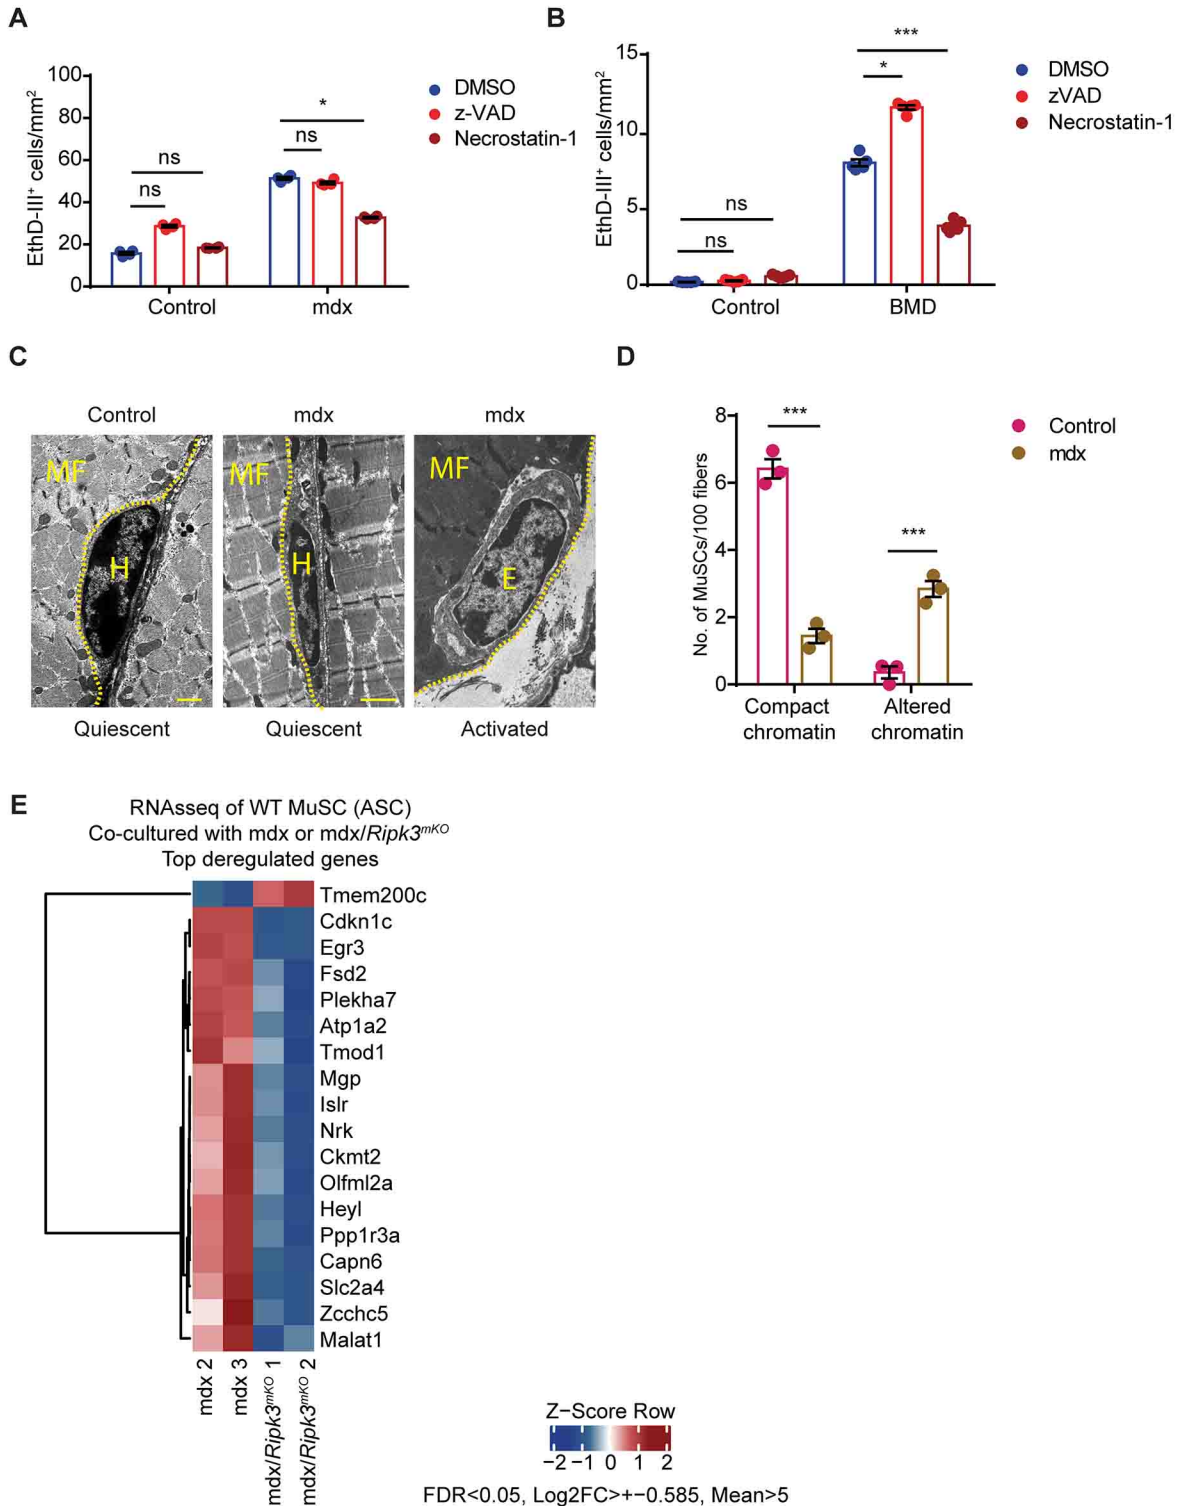

**Supplemental Figure 2: MuSC from *mdx* mice and from human BMD patients are predisposed to programmed cell death. Related to Figure 3.**

(A) End-point quantification of EthD-III incorporating necroptotic MuSC from control and *mdx* mice treated with z-VAD or Necrostatin-1 and DMSO (n=3 for each group; \*p<0.05 two-way ANOVA followed by Bonferroni post-test with alpha=5%).

(B) End-point quantification of EthD-III incorporating necroptotic MuSC (100 hours) from control and BMD individuals treated with DMSO, z-VAD or Necrostatin-1, (n=3 for each group; \*p<0.05, \*\*\*p<0.005; two-way ANOVA followed by Bonferroni post-test with alpha=5%).

(C, D) Representative EM images of wiltype control and *mdx* MuSCs (MF = myofiber, H = compact heterochromatin, E = open euchromatin) (C) and quantified in (D) (n=3 for each group; \*\*\*p<0.005, two-way ANOVA followed by Bonferroni post-test with alpha=5%). Scale bar: 1  $\mu$ m.

(E) Heatmap representing gene expression of deregulated genes (DEGs) (Log2 expression) in MuSC from transwell-assay. WT MuSCs co-cultured with *mdx* or *mdx/Ripk3<sup>mKO</sup>* were subjected to RNAseq analysis (n=2).

All analyses indicated across the experiments were biological replicates unless otherwise stated.

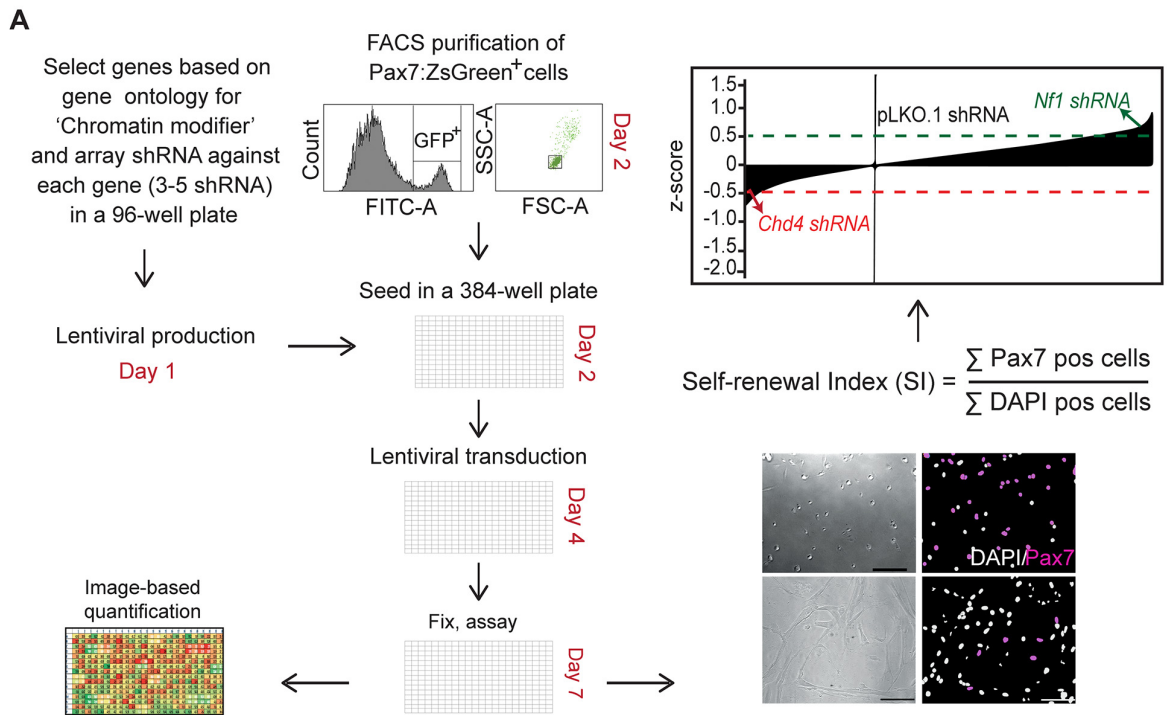

**B**

| Increase of Pax7 <sup>+</sup> MuSCs  | Decrease of Pax7 <sup>+</sup> MuSCs                   | Previously reported MuSC regulators              |
|--------------------------------------|-------------------------------------------------------|--------------------------------------------------|
| 31/650 [5%]                          | 27/650 [4%]                                           | 12/58 [20%]                                      |
| <u>shRNA targets</u>                 | <u>shRNA targets</u>                                  | <u>shRNA targets</u>                             |
| Mbd1, Trp53, Cbx5, Suv39h2, AA619741 | Chd4, Hdac2, Rbb4, Mta2, 6330407J23Rik, 1700012L04Rik | Suv420h1, Hdac6, Ezh2, Ets2, Sirt1, Myocd, Sox15 |

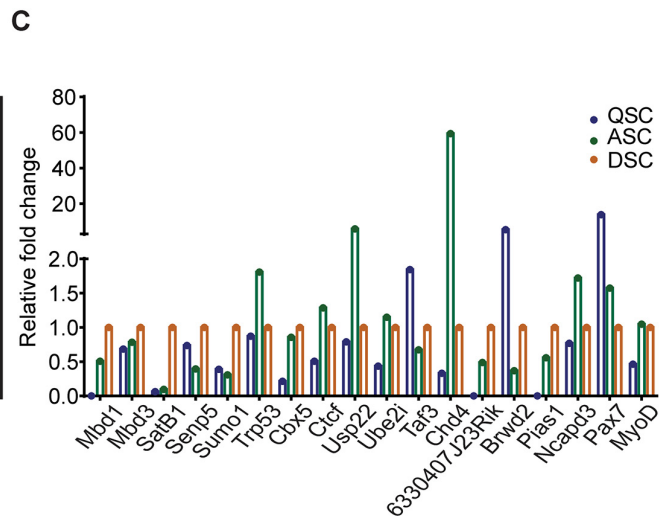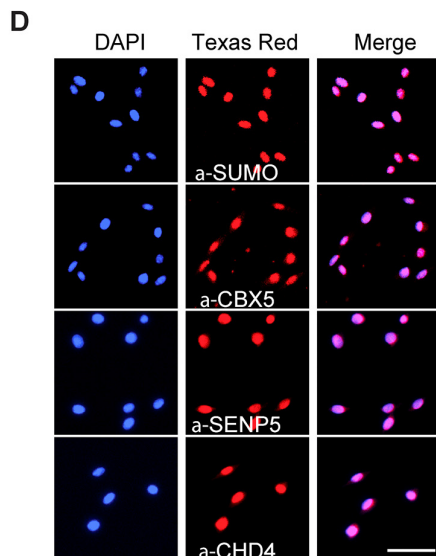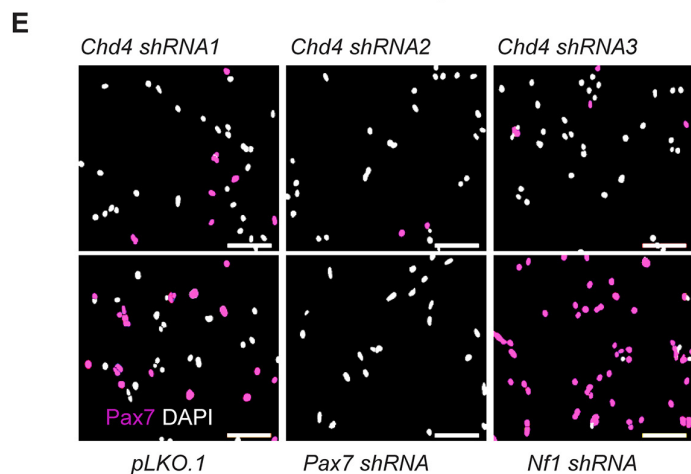

**Supplemental Figure 3: Identification of chromatin modifiers regulating survival and expansion of MuSC by an shRNA screen. Related to Figure 4.**

(A) Schematic representation of the shRNA screen for chromatin modifiers in MuSC.

(B) Novel and previously identified chromatin modifiers regulating MuSC survival and proliferation.

(C, D) RT-qPCR (C) and immunofluorescence analysis (activated MuSCs) (D) of expression of candidate genes regulating MuSC function (QSC = freshly isolated, ASC= Activated, DSC = Differentiated MuSC). Scale bar (D): 100  $\mu$ m.

(E) Secondary validation of the role of Chd4 by shRNA mediated knockdown. shRNAs against *Pax7* and *Nf1* served as controls. Scale bar: 100  $\mu$ m.

All analyses indicated across the experiments were biological replicates unless otherwise stated.



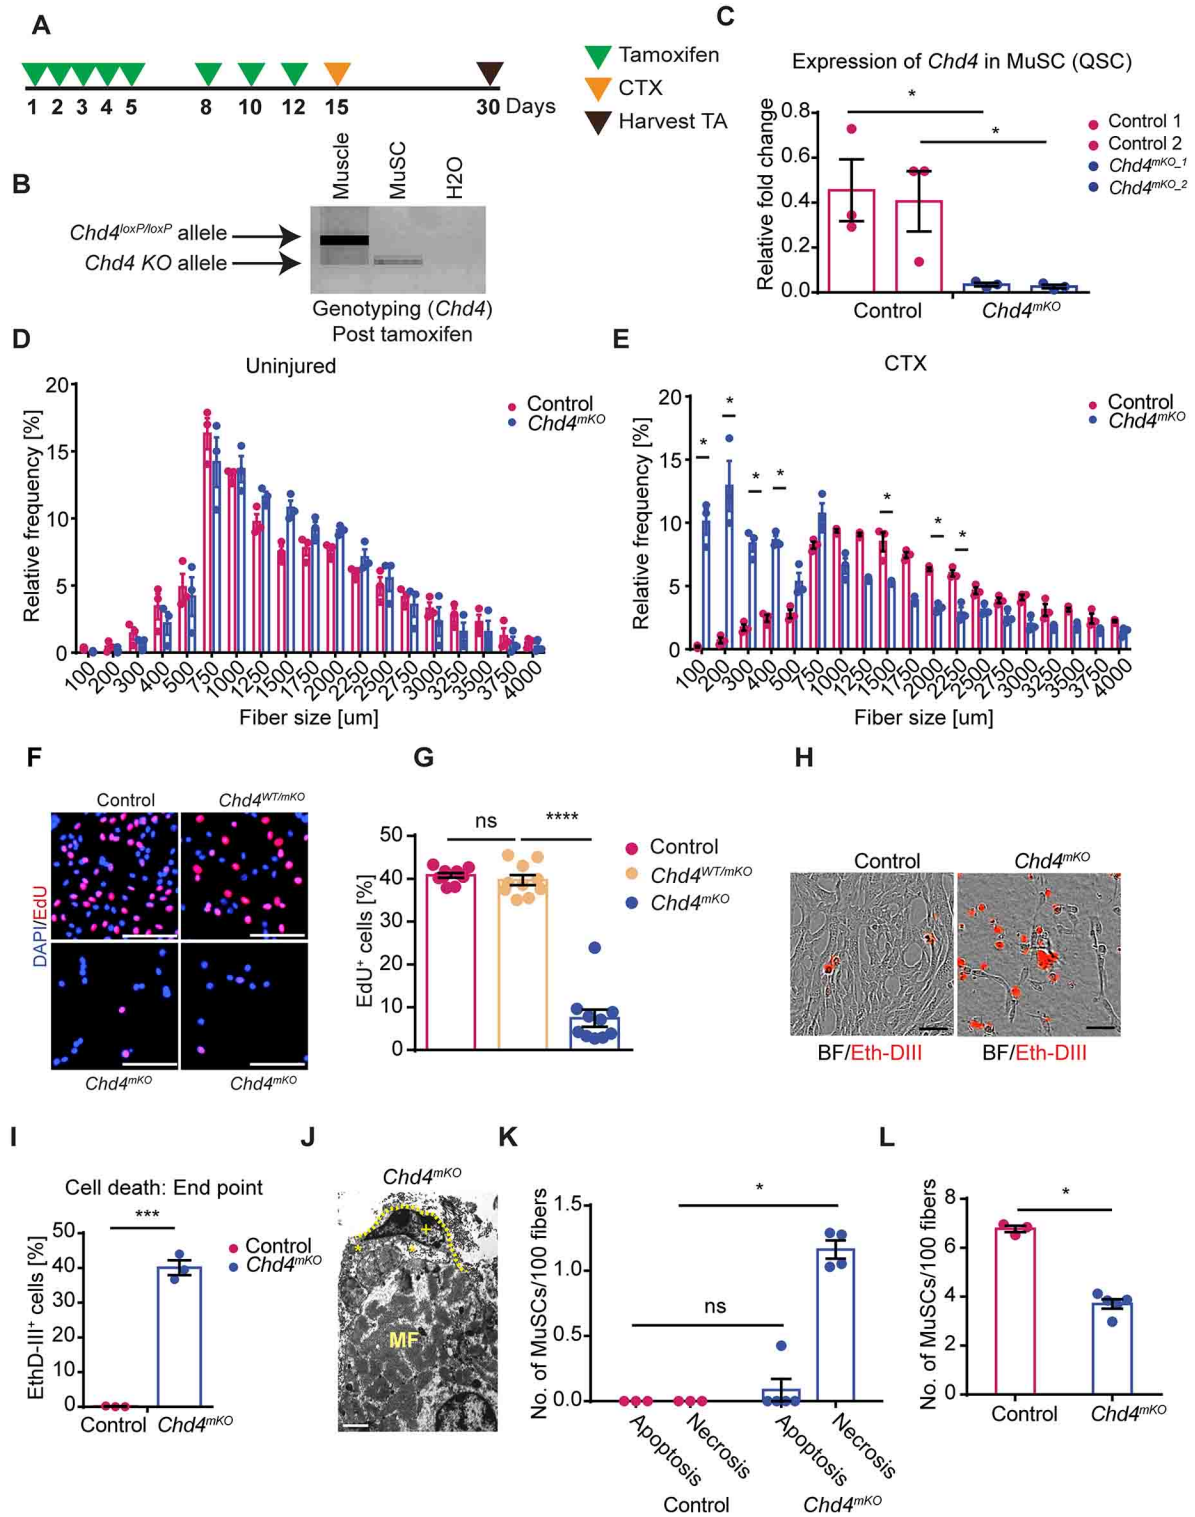

**Supplemental Figure 4: *Chd4* is required for skeletal muscle regeneration. Related to Figure 4.**

(A) Schematic representation of the tamoxifen treatment regimen, CTX injury and time point of TA muscle collection.

(B) PCR-based genotyping of skeletal muscle and MuSC purified from *Chd4<sup>mKO</sup>* mice after tamoxifen treatment.

(C) RT-qPCR analysis of *Chd4* expression in MuSC from control and *Chd4<sup>mKO</sup>* mice (n=3 for each group).

(D-E) Relative frequency of muscle fiber sizes in TA muscles from control and *Chd4<sup>mKO</sup>* mice (n=3 for each group; \*p<0.05; two-way ANOVA followed by Bonferroni post-test with alpha=5%).



(F, G) Representative images and quantification of EdU incorporation in cultured MuSC from control, Chd4<sup>mkO/+</sup> and Chd4<sup>mkO</sup> muscles (n=10 for each group). Scale bar: 100  $\mu$ m.

(H, I) Analysis of EthD-III-incorporating necroptotic MuSC derived from control and Chd4<sup>mkO</sup> mice in culture (n=3 for each group). Scale bar: 100  $\mu$ m.

(J) Representative EM micrograph of necrotic MuSC in TA muscles of Chd4<sup>mkO</sup> mice (MF = myofiber, + = intact chromatin/nucleus (necrosis), \* = MuSC disrupted membrane). Scale bar: 1  $\mu$ m.

(K, L) Quantification of apoptotic and necrotic MuSC in control (n=3-5) and Chd4<sup>mkO</sup> muscles (n=5) by EM (\*p<0.05, \*\*\*p<0.005, \*\*\*\*p< 0.001; two-way ANOVA followed by Bonferroni post-test with alpha=5%).

All analyses indicated across the experiments were biological replicates unless otherwise stated.

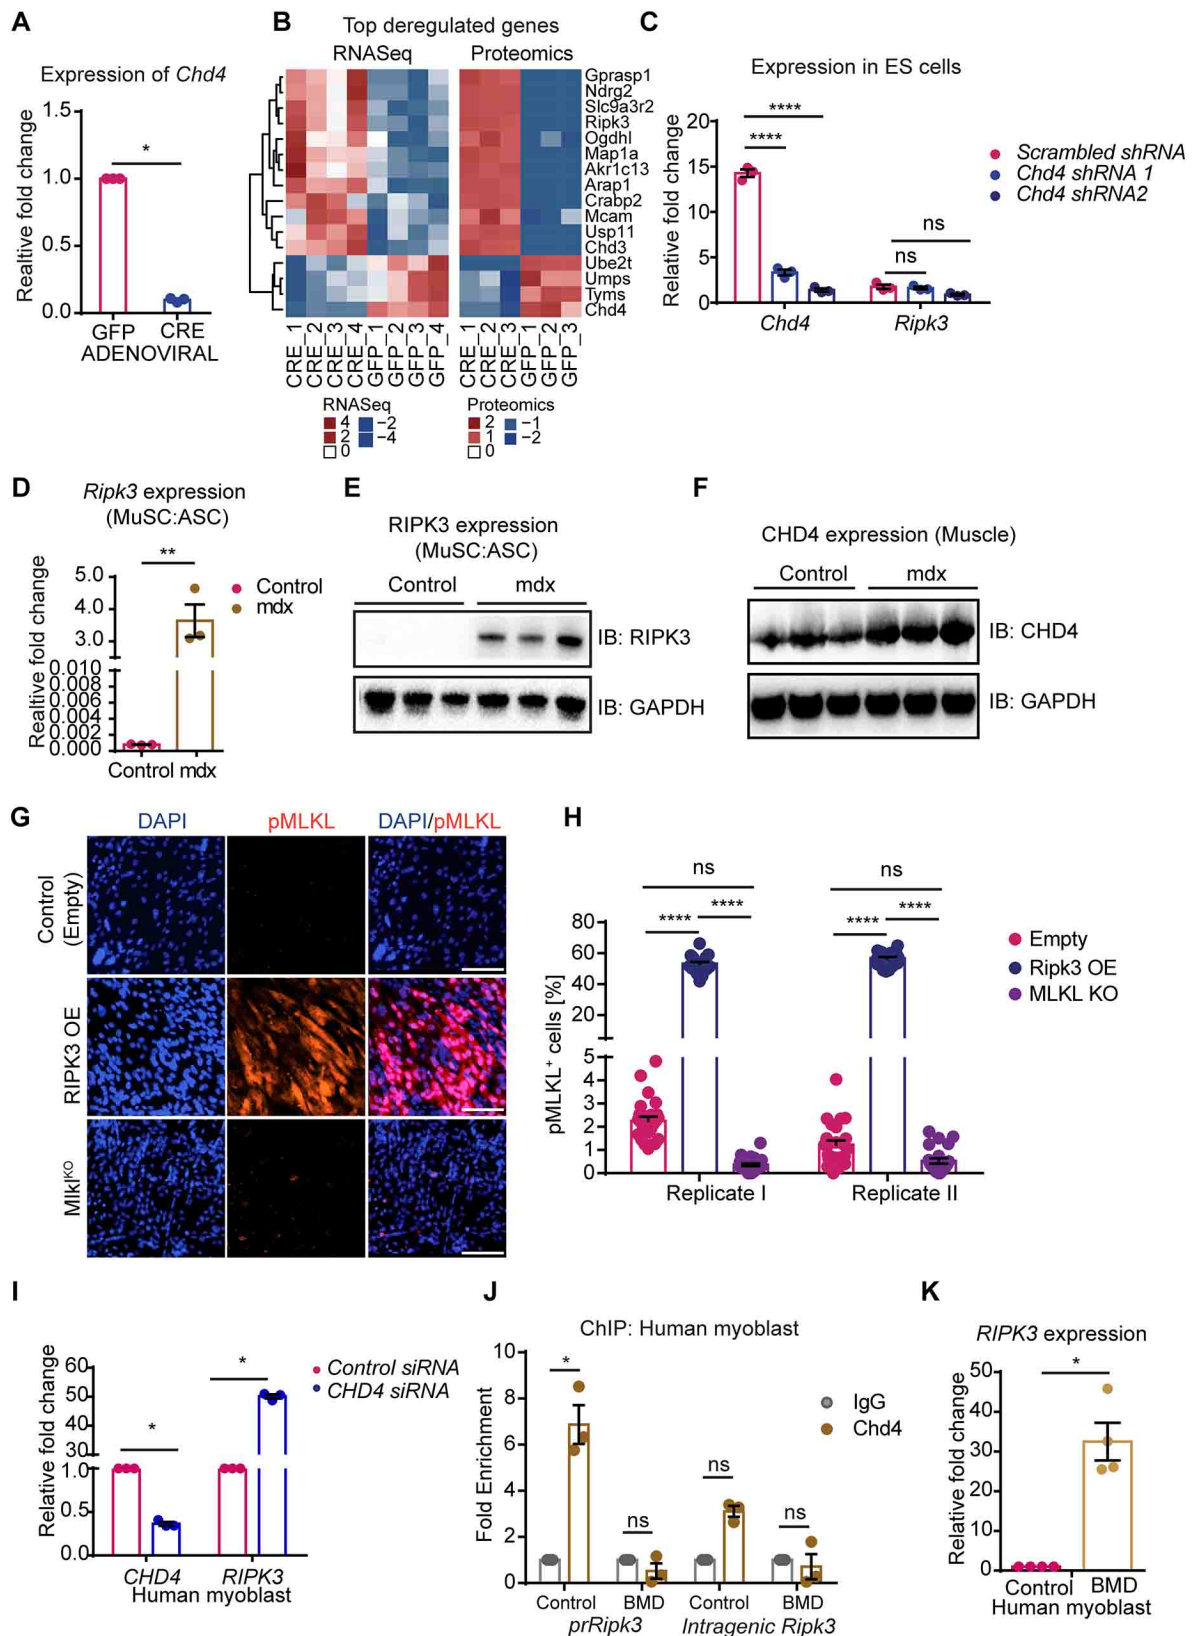

**Supplemental Figure 5: Upregulation of *Ripk3* in *mdx* MuSC is sufficient to induce necroptosis. Related to Figure 5.**

(A) RT-qPCR analysis of *Chd4* expression after Adeno-cre and Adeno-GFP infections of MuSC from *Chd4<sup>loxP/loxP</sup>* mice (n=4 for each group).

(B) Heatmap representation of gene expression of top 10 deregulated genes following adenoviral infection of MuSC from *Chd4<sup>loxP/loxP</sup>* mice.

(C) RT-qPCR analysis of *Chd4* and *Ripk3* expression in ESCs after shRNA mediated knockdown of *Chd4*.

(D, E) RT-qPCR and Western blot analysis of *Ripk3* expression in MuSC from control and *mdx* mice (n=3 for each group).

(F) Western blot analysis of CHD4 expression in muscle tissues from control and *mdx* mice (n=3 for each group). (G) Immunofluorescence staining for pMLKL of proliferating WT MuSCs transduced with control (empty vector) and RIPK3OE (*Ripk3*-expression vector) lentiviral vectors. MuSC from MLKL<sup>KO</sup> mice (*MLKL*<sup>-/-</sup>) were used as a negative control. Scale bar: 100 μm.

(H) Quantification of pMLKL<sup>+</sup> MuSC undergoing necroptosis (n=25 view fields in each of two independent lentiviral transduction). (\*p<0.05, \*\*p<0.01, \*\*\*p<0.005, \*\*\*\*p<0.001; two-way ANOVA followed by Bonferroni post-test with alpha=5%).

I) RT-qPCR analysis of *Chd4* and *Ripk3* expression in human myoblasts after shRNA mediated knockdown of *Chd4*.

(J) ChIP-qPCR analysis of CHD4 binding to the promoter and intragenic regions of the *Ripk3* gene in myoblasts from healthy human controls and BMD patients. (K) RT-qPCR analyses of *Ripk3* expression in myoblasts from healthy human controls and BMD patients. (in J and K: n=3 for each group; \*p<0.05, \*\*p<0.01, \*\*\*p<0.005; two-way ANOVA followed by Bonferroni post-test with alpha=5%).

All analyses indicated across the experiments were biological replicates unless otherwise stated.

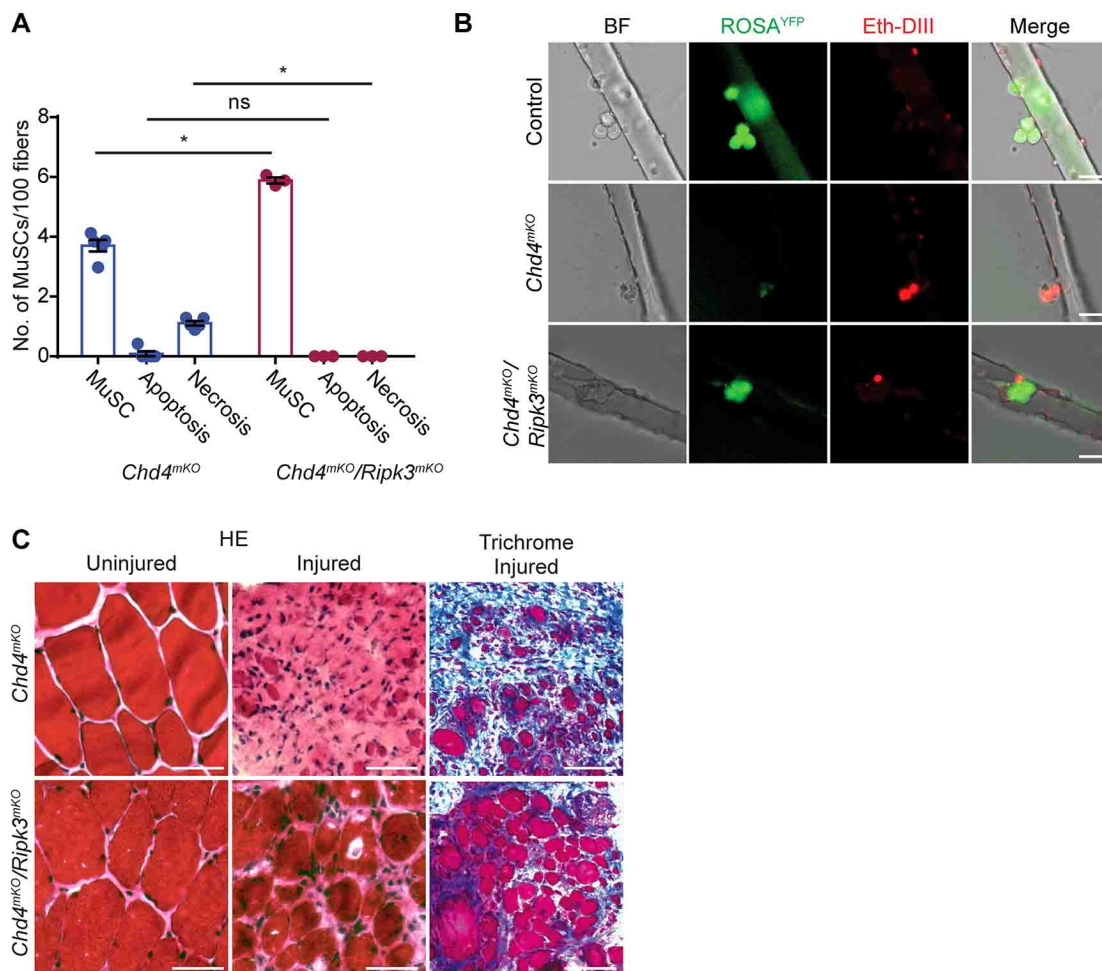

**Supplemental Figure 6: Inhibition of necroptosis by inactivation of *Ripk3* in *Chd4<sup>mKO</sup>* MuSC improves muscle regeneration. Related to Figure 6.**

(A) Quantification of MuSC undergoing apoptosis and necroptosis in *Chd4<sup>mKO</sup>* and *Chd4<sup>mKO</sup>/Ripk3<sup>mKO</sup>* mice based on EM analysis (n=3 each; \*p<0.05; two-way ANOVA followed by Bonferroni post-test with alpha=5%).

(B) Images of *ex-vivo* cultured (day 3) single myofibers derived from Flexor Digitorum Brevis (FDB) muscles of control, *Chd4<sup>mKO</sup>/ROSA26<sup>YFP</sup>* and *Chd4<sup>mKO</sup>/ROSA26<sup>YFP</sup>/Ripk3<sup>mKO</sup>* mice (n=3 for each group). Activation of the ROSA26<sup>YFP</sup> reporter was used to monitor recombined MuSC. Incorporation of the EthD-III dye (red) labels cells undergoing necroptosis. Scale bar: 25  $\mu$ m.

(C) Representative H&E and trichrome staining of TA muscle cross-sections from *Chd4<sup>mKO</sup>* and *Chd4<sup>mKO</sup>/Ripk3<sup>mKO</sup>* mice. Scale bar: 100  $\mu$ m.

All analyses indicated across the experiments were biological replicates unless otherwise stated.

| Gene Name                                | Forward Primer                    | Reverse Primer                                       |
|------------------------------------------|-----------------------------------|------------------------------------------------------|
| <b>ChIP qRT-PCR</b>                      |                                   |                                                      |
| <b>prRipk3 (-963 to -766)</b>            | TGCCGCTTAGTAGGCAAAAT              | GGGTCAGTTTGTCTCTGCTG                                 |
| <b>Intragenic Ripk3 (+1053 to +1262)</b> | TGAGTTGCTGATGGGCAG                | AGTGTAGACTTGGGACCA                                   |
| <b>qRT-PCR (Gene Expression)</b>         |                                   |                                                      |
| <b>Mbd1</b>                              | GAGGACGAGCTACAGCCCTA              | TTGCCACCCCGAATTTGG                                   |
| <b>Mbd3</b>                              | CCCCAGCGGGAAGAAGTTC               | CGGAAGTCGAAGGTGCTGAG                                 |
| <b>SatB1</b>                             | CATGTTACCAGTTTTCTGCGTG            | GTGAATAGCCTAGAGACAGCAAC                              |
| <b>Senp5</b>                             | CCCCAAAACCTTGTGCTTTCTGA           | AGTAGCCAGTCCAGACTTTGT                                |
| <b>Sumo1</b>                             | ATTGGACAGGATAGCAGTGAGA            | TCCAGTTCTTTCGGAGTATGA                                |
| <b>Trp53</b>                             | GCGTAAACGCTTCGAGATGTT             | TTTTTATGGCGGGAAGTAGACTG                              |
| <b>Cbx5</b>                              | GACAGGCGCATGGTTAAGG               | CCTGGGCTTATTGTTTTACCC                                |
| <b>Ctcf</b>                              | GATCCTACCCTTCTCCAGATGAA           | GTACCGTCACAGGAACAGGT                                 |
| <b>Usp22</b>                             | CTCCCCACACATTCCATAACAAG           | TGGAGCCCACCCGTAAGA                                   |
| <b>Ube2i</b>                             | TCATCCAAACGTGTATCCTTCTG           | CTTGTGCTCGGACCCTTTTCT                                |
| <b>Taf3</b>                              | TGAGAACTTCTTGGGTAAGAGGC           | TAGGGAGTCCCCTTTAGTGCT                                |
| <b>Chd4</b>                              | GAAATTGCTGCGGCACCATTA             | AGCCATCATTGTAGTTGACCTG                               |
| <b>Brwd2</b>                             | CCCTACACCGTAAACTTCAAGG            | ACTACCACCAGTGAATGGCAT                                |
| <b>6330407J23Rik</b>                     | GACGACAATGAGGATCTCAAGTG           | TGCTTCTCCTTTGGGTAGAGG                                |
| <b>Pias1</b>                             | GCGGACAGTGCGGAACTAAA              | ATGCAGGGCTTTTGTAAAGAAGT                              |
| <b>Ncapd3</b>                            | TCTCAGCCTCGAATGGGTGAA             | CTCTCCAGTCTCTAGGATCTCG                               |
| <b>Pax7</b>                              | TCTCCAAGATTCTGTCCGAT              | CGGGGTTCTCTCTTATACTCC                                |
| <b>MyoD</b>                              | CCACTCCGGGACATAGACTTG             | AAAAGCGCAGGTCTGGTGAG                                 |
| <b>Ripk3</b>                             | TCTGTCAAGTTATGGCCTACTGG           | GGAACACGACTCCGAACCC                                  |
| <b>m36B4</b>                             | AGATTCGGGATATGCTGTTGGC            | TCGGGTCTAGACCAGTGTTT                                 |
| <b>Genotyping primer</b>                 |                                   |                                                      |
| <b>Pax7 CreERT2</b>                      | ACTAGGCTCCACTCTGTCTTC             | GCAGATGTAGGGACATTCCAGTG                              |
| <b>Pax7 Cre WT</b>                       | GCTCTGGATACACCTGAGTCT             | TCGGCCTTCTTCTAGGTTCTGCTC                             |
| <b>Pax7 Cre MT</b>                       | TCGGCCTTCTTCTAGGTTCTGCTC          | GGATAGTGAACAGGGGCAA                                  |
| <b>ZsGreen</b>                           | CTGCATGTACCACGAGTCCA              | GTCAGCTGCCACTTCTGGTT                                 |
| <b>ROSA-YFP</b>                          | AAAGTCGCTCTGAGTTGTTAT             | GGAGCGGGAGAAATGGATATG                                |
| <b>Mdx WT</b>                            | GCGCGAAACTCATCAAATATGCGTGTTAG TGT | GATACGCTGCTTTAATGCCTTTAG TCACTCAGATAGTTGAAGCCATT TTG |
| <b>Mdx MT</b>                            | GCGCGAAACTCATCAAATATGCGTGTTAG TGT | CGGCCTGTCACTCAGATAGTTGA A                            |
| <b>Chd4loxP</b>                          | CTCCAAGAAGAAGACGGCAGATCT          | GTCCTTCCAAGAAGAGCAAG                                 |
| <b>Chd4KO</b>                            | CTCCAAGAAGAAGACGGCAGATCT          | CTCCACAGTGACGTCCAGACGC A                             |
| <b>Ripk3loxP</b>                         | GATCCAGAGCTCCACGCCAAG             | TGGAGGACCAGAGGGAAGGT                                 |

**Supplementary Table 5 (Related to STAR methods).**

List of primer sequences used in the study.
